# Supplementary material for: Assessment of Squalene-Adenosine Nanoparticles in Two Rodent Models of Cardiac Ischemia-Reperfusion
Source: MDPI journal article supplement (doi:10.3390/pharmaceutics15071790), 2023-06-21
Supplement: s1 [file s1]

## *Supplementary data*

# Assessment of Squalene-Adenosine Nanoparticles in Two Rodent Models of Cardiac Ischemia-Reperfusion

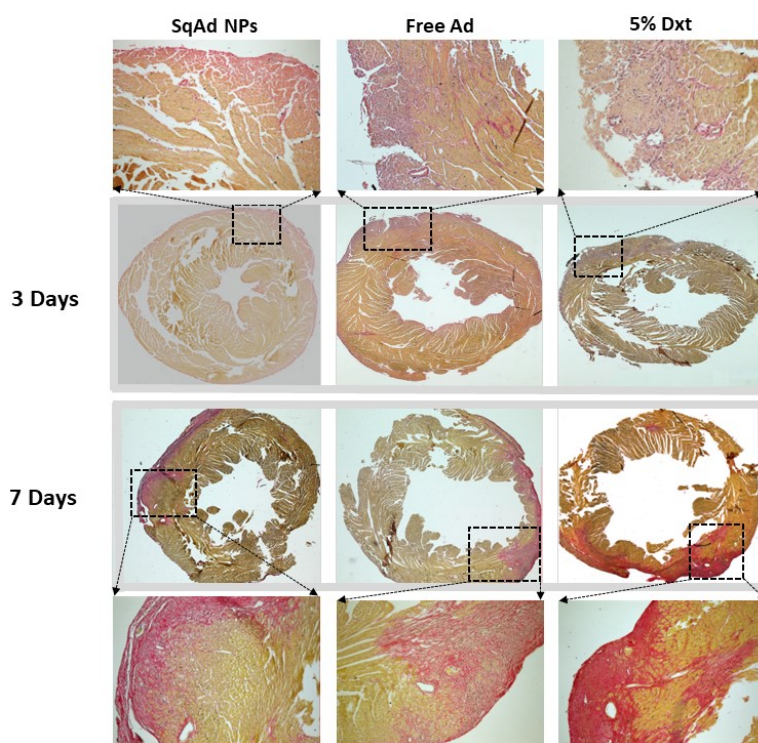

**Figure S1:** Picrosirius red staining revealed the presence of fibrosis on heart sections obtained from mice submitted to 30 minutes of ischemia and followed by 3- or 7-days of reperfusion. The inset shows the magnification of a selected area. Representative images of Picrosirius red staining (2.5 x; insets, 10x) for each group.

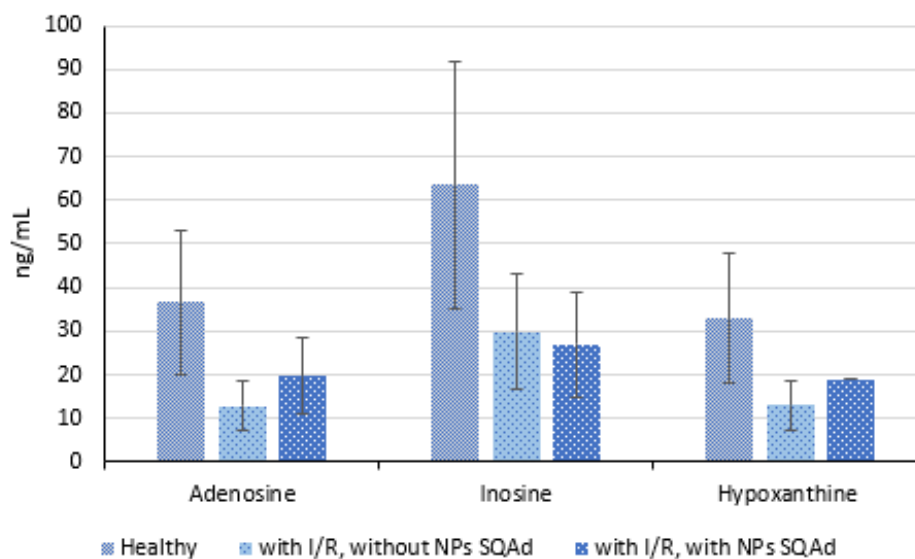

**Figure S2:** Whole blood quantification of adenosine, inosine and hypoxanthine.

250  $\mu$ L of whole blood was taken from rats submitted to ischemia (30 min) and reperfusion (6 hours) and without prior administration of SQAd NPs. As control, 250  $\mu$ L of whole blood was taken from healthy rats without prior administration of SQAd NPs.

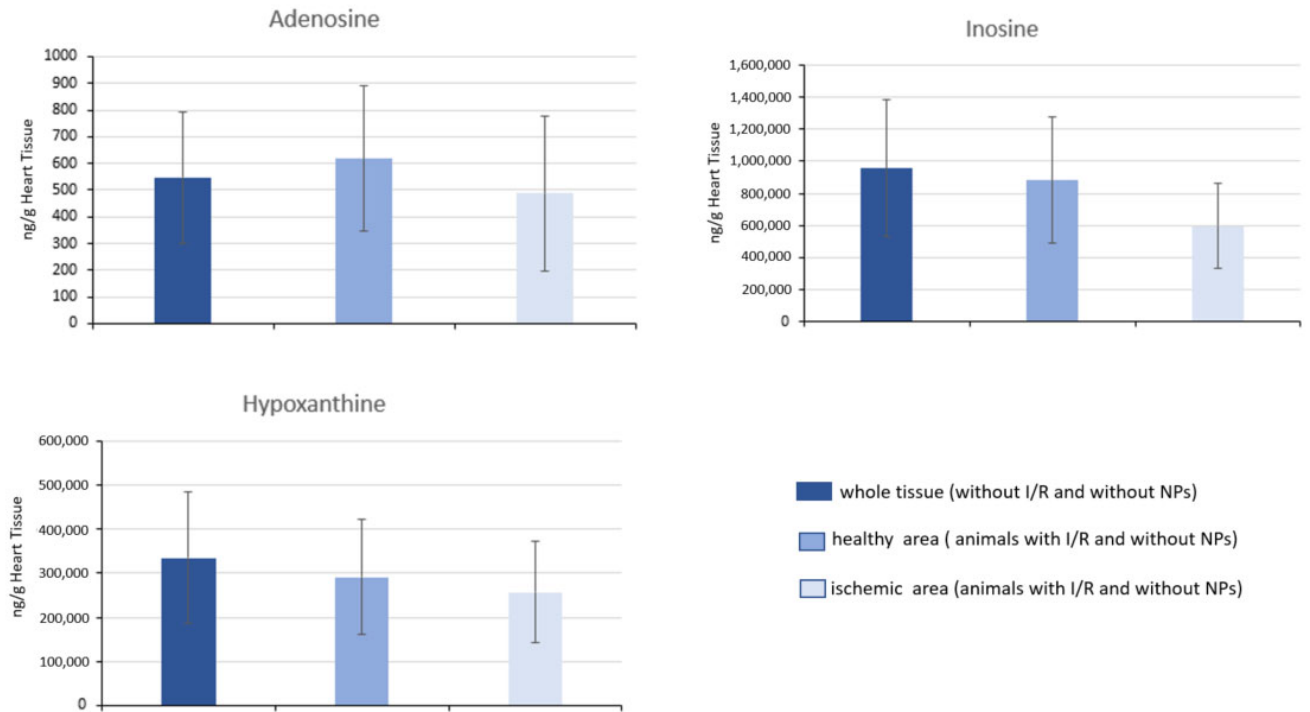

**Figure S3: Cardiac quantification of adenosine, inosine and hypoxanthine.**

Quantification was done on heart tissues from rats without or with ischemia (30 min) and reperfusion (6 hours) without prior administration of SQAd NPs. In rats with ischemia and reperfusion a comparison between ischemic and non-ischemic zone was performed.
